# Supplementary material for: Collaborative community based care for people and their families living with schizophrenia in India: protocol for a randomised controlled trial
Source: Springer Nature journal article supplement (doi:10.1186/1745-6215-12-12), 2011-01-13

Enrolment

**Assessed for eligibility (n=)**

**Excluded:**  
Not meeting inclusion criteria (n=)  
Not assented (n=)  
Declined to participate (n=)  
Other reasons (n=)

**Randomised: (n=)**  
**Qualitative sub sample: (n=)**

Allocation

**Allocated to intervention (CCBC): (n=)**  
**Received allocated intervention: (n=)**  
**Did not receive allocated intervention (give reasons) (n=)**

**Allocated to control (FBC): (n=)**  
**Received allocated intervention: (n=)**  
**Did not receive allocated intervention (give reasons) (n=)**

Follow-up

**Lost to follow up (n=)**  
**Discontinued intervention (give reasons) (n=)**

**Lost to follow up (n=)**  
**Discontinued intervention (give reasons) (n=)**

Analysis

**Analysed for 6 and 12 month outcomes: (n=)**  
**Excluded from analysis (give reasons) (n=0)**

**Analysed for 6 and 12 month outcomes: (n=)**  
**Excluded from analysis (give reasons) (n=0)**

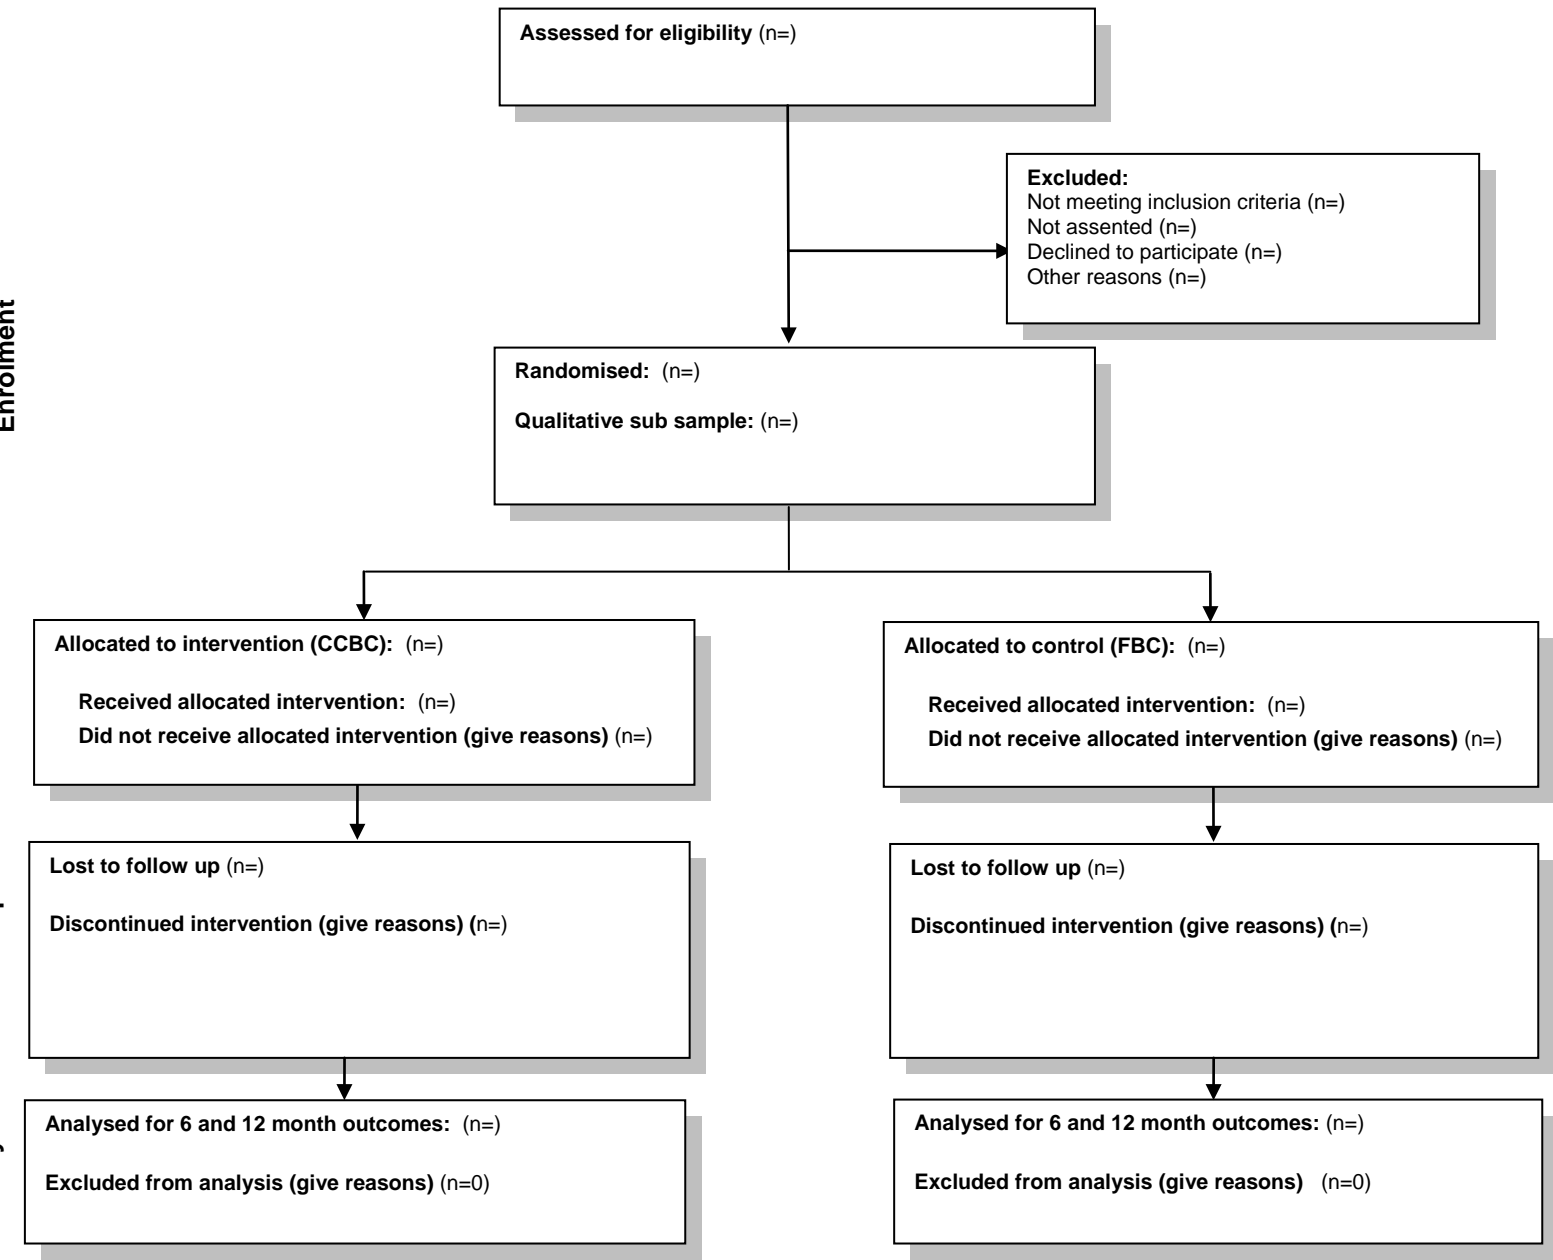

Supplement: 13063_2010_546_MOESM1_ESM.pdf [file 13063_2010_546_MOESM1_ESM.pdf]
